# Supplementary material for: A novel ascorbic acid electrochemical sensor based on spherical MOF-5 arrayed on a three-dimensional porous carbon electrode
Source: Royal Society of Chemistry journal article supplement (doi:10.1039/c6ay00136j), 2016-01-01
Supplement: c6ay00136j1.pdf [file c6ay00136j1.pdf]

Supporting Information

**A novel ascorbic acid electrochemical sensor based on  
spherical MOF-5 arrayed on three-dimensional porous carbon  
electrode**

Yonggui Song<sup>1,2</sup>, Couchong Gong<sup>1</sup>, Dan Su<sup>2</sup>, Yuan Shen<sup>1</sup>, Yonghai Song<sup>1</sup> and Li Wang<sup>1,\*</sup>

*<sup>1</sup>Key Laboratory of Functional Small Organic Molecule, Ministry of Education, Key  
Laboratory of Chemical Biology, Jiangxi Province, College of Chemistry and Chemical  
Engineering, Jiangxi Normal University, Nanchang 330022, China.*

*<sup>2</sup>Jiangxi University of Chinese Traditional Medicine, 56 Yangming Road, Nanchang 330006,  
China.*

---

\*Corresponding author: Tel/Fax: +86 791 88120861. E-mail: lwanggroup@aliyun.com (L. Wang).

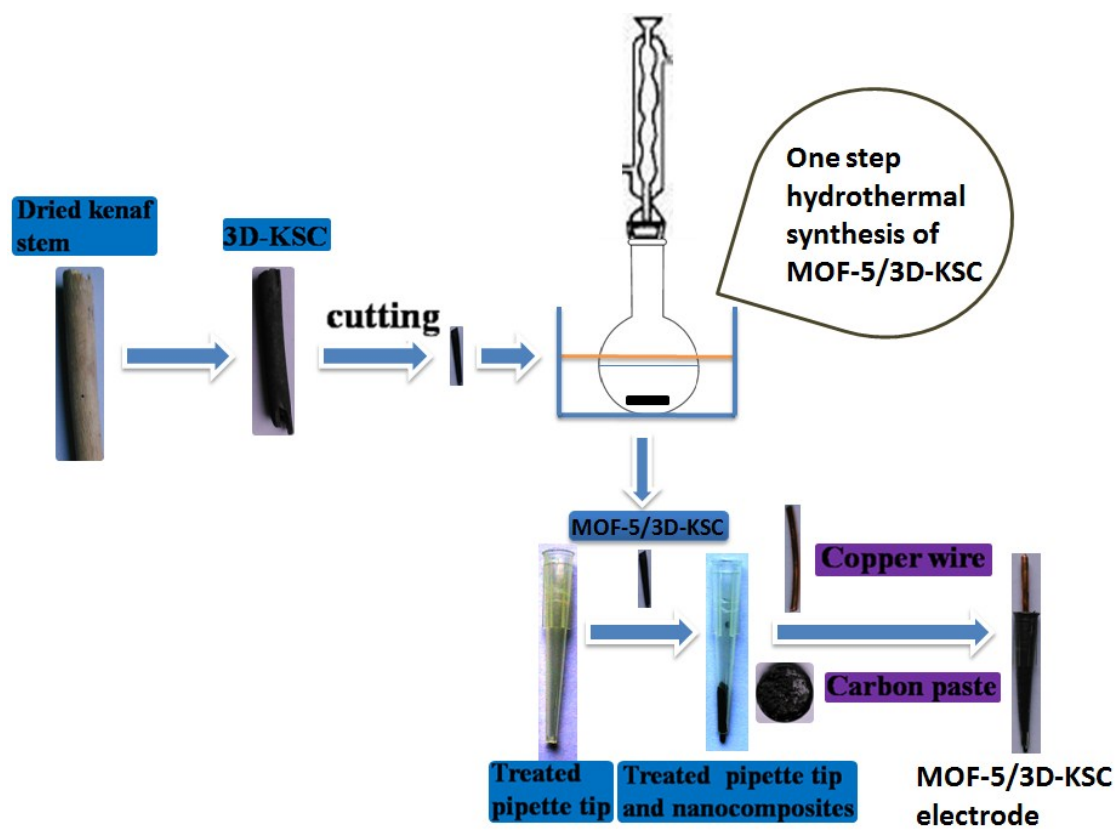

**Fig. S1.** Schematic illustration of the fabrication of MOF-5/3D-KSC composites and integrated MOF-5/3D-KSC electrode.

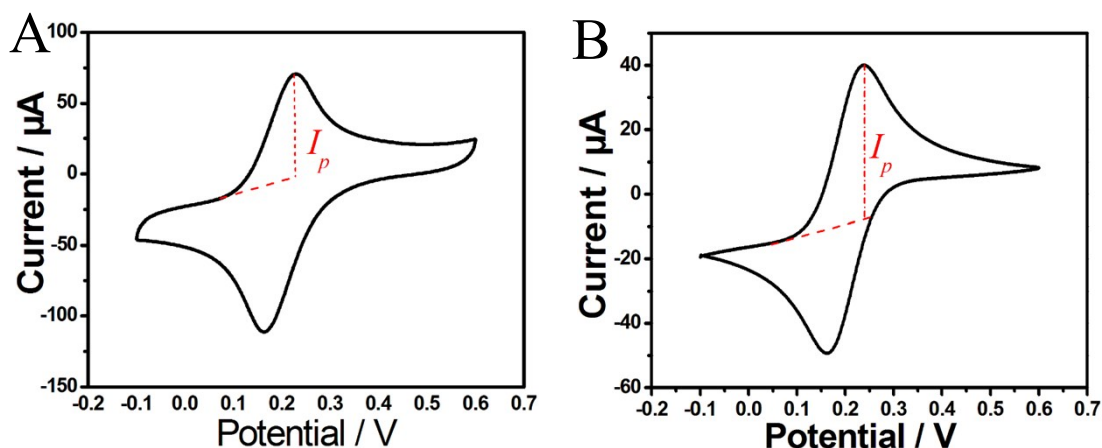

**Fig. S2.** CVs of GC electrode (A) and integrated MOF-5/3D-KSC electrode (B) in 0.1 M KCl solution containing 5.0 mM  $\text{Fe}(\text{CN})_6^{3-/4-}$  at  $50 \text{ mVs}^{-1}$ .

The effective surface areas ( $A_{\text{eff}}$ ) of various GC electrode and integrated MOF-5/3D-KSC electrode were estimated before use based on the CVs in 0.1 M KCl solution containing 5.0 mM  $\text{Fe}(\text{CN})_6^{3-/4-}$  at  $0.05 \text{ V s}^{-1}$  according to Randles-Sevcik equation:

$$I_p = 2.69 \times 10^5 A n^{3/2} D_0^{1/2} \nu^{1/2} C_0 \quad (1)$$

where  $n$  is the number of electrons participating in the redox ( $n = 1$  for  $\text{Fe}(\text{CN})_6^{3-/4-}$ ),  $D_0$  is the diffusion coefficient of the molecule in a solution ( $0.673 \times 10^{-5} \text{ cm}^2 \text{ s}^{-1}$  for  $\text{Fe}(\text{CN})_6^{3-/4-}$  in 0.1 M KCl solution),  $C_0$  is the bulk concentration of the redox probe ( $C_0 = 5 \text{ mM}$  of the  $\text{Fe}(\text{CN})_6^{3-/4-}$ ). As shown in Fig. S1, the  $I_p$  was calculated to be 47.66 (A) and 78.35 (B) and accordingly the value of  $A_{\text{eff}}$  for the GC electrode and integrated MOF-5/3D-KSC electrode was estimated to be  $0.0610 \text{ cm}^2$  and  $0.1003 \text{ cm}^2$ .

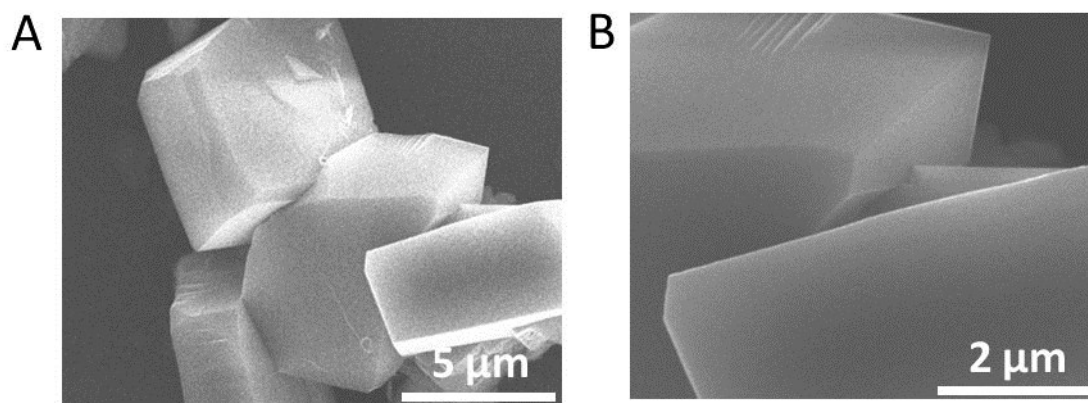

**Fig. S3.** (A) SEM image of MOF-5. (B) The high magnification image of MOF-5.

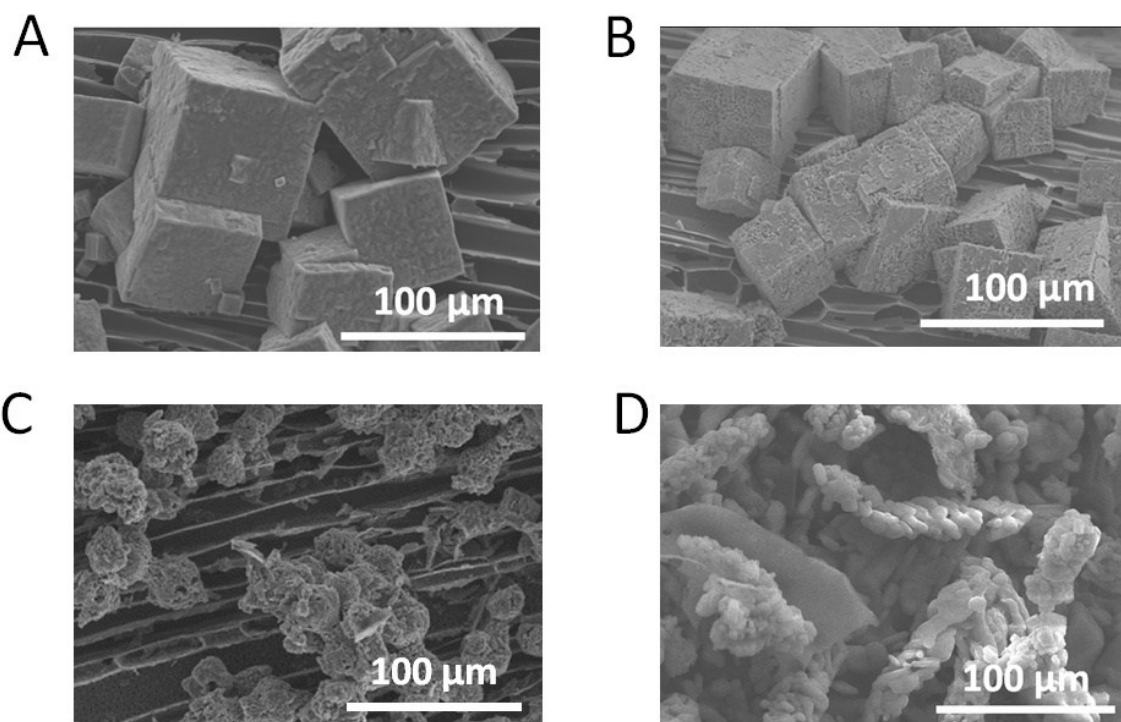

**Fig. S4.** SEM images of the MOF-5/3D-KSC composites prepared by (A) 40 mg ml<sup>-1</sup> (B) 60 mg ml<sup>-1</sup> (C) 70 mg ml<sup>-1</sup> (D) 90 mg ml<sup>-1</sup> zinc nitrate hexahydrate, and the concentration ratio of zinc nitrate hexahydrate and H<sub>2</sub>BDC is 5.45:1.

**Table. S1** Determination AA in parenteral nutrient solution samples (N= 5)

| NO. | The content<br>(mM) | Added<br>(mM) | Found<br>(mM) | RSD<br>(%) | Recover<br>y<br>(%) | HPLC<br>method<br>(mM) | RSD<br>(%) |
|-----|---------------------|---------------|---------------|------------|---------------------|------------------------|------------|
| 1   | 3.78                | 3             | 6.65          | 2.9        | 95.7                | 6.71                   | 1.9        |
| 2   | 3.86                | 3             | 6.76          | 2.8        | 96.7                | 6.68                   | 1.7        |
| 3   | 4.05                | 3             | 6.91          | 3.2        | 95.3                | 7.11                   | 1.8        |
| 4   | 3.25                | 3             | 6.18          | 2.6        | 97.6                | 6.15                   | 1.5        |
